# Supplementary material
Source: publisher figshare collection journal article supplement (https://acs.figshare.com/ndownloader/files/16600073)
Supplement: Supplementary file 1 [file 16600073]

Compound	Smiles	IC50 (nM) human 17§-HSD2	IC50 (nM) human 17§-HSD1	IC50 (nM) mouse 17§-HSD2	IC50 (nM) rat 17§-HSD2	Metabolic stability human Liver S9 t1/2 (min)	Metabolic stability mouse Liver S9 t1/2 (min)	Metabolic stability rat Liver S9 t1/2 (min)
10	O=C(C1=C(F)C(O)=C(F)C(F)=C1)C2=CC=C(C3=CC(NS(C)(=O)=O)=CC=C3)S2	4.0	10.0	38%@1µM	n.d.	25.0	68.0	n.d.
11	O=C(C1=C(F)C(O)=C(F)C(F)=C1)C2=CC=C(C3=CC(NS(C4CC4)(=O)=O)=CC=C3)S2	5.0	5.0	26%@1µM	n.d.	n.d	n.d	n.d.
12	O=C(C1=C(F)C(O)=C(F)C(F)=C1)C2=CC=C(C3=CC(NS(C4=CN(C)C=N4)(=O)=O)=CC=C3)S2	4.0	21.0	15%@1µM	n.d.	n.d	n.d	n.d.
13	O=C(C1=C(F)C(O)=C(F)C(F)=C1)C2=CC=C(C3=CC(NS(C4=CN=CC=C4)(=O)=O)=CC=C3)S2	6.0	6.0	25%@1µM	n.d.	n.d	n.d	n.d.
14	O=C(C1=C(F)C(O)=C(F)C(F)=C1)C2=CC=C(C3=CC(NS(C4=CN=C(Cl)C=C4)(=O)=O)=CC=C3)S2	6.0	7.0	47.0	n.d.	55.0	66	n.d.
15	O=C(C1=C(F)C(O)=C(F)C(F)=C1)C2=CC=C(C3=CC(NS(C4=CC=C(C#N)C=C4)(=O)=O)=CC=C3)S2	3.0	10.0	25.0	10	42.0	>120	>>60
16	O=C(C1=C(F)C(O)=C(F)C(F)=C1)C2=CC=C(C3=CC(NS(C4=CC=CC(C#N)=C4)(=O)=O)=CC=C3)S2	1.0	4.0	15.0	n.d.	48.0	>120	n.d.
17	O=C(C1=C(F)C(O)=C(F)C(F)=C1)C2=CC=C(C3=CC(NS(C4=CC=CC=C4C#N)(=O)=O)=CC=C3)S2	1.0	0.6	28.0	n.d.	n.d	n.d	n.d.
18	O=C(C1=C(F)C(O)=C(F)C(F)=C1)C2=CC=C(C3=C(C)C(NS(C4=CC=C(F)C=C4)(=O)=O)=CC=C3)S2	10.0	5.0	40%@1µM	n.d.	31.0	n.d	n.d.
19	O=C(C1=C(F)C(O)=C(F)C(F)=C1)C2=CC=C(C3=CC(NS(C4=CC=C(F)C=C4)(=O)=O)=C(C)C=C3)S2	1.0	2.0	32%@1µM	n.d.	38.0	n.d	n.d.
20	O=C(C1=C(F)C(O)=C(F)C(F)=C1)C2=CC=C(C3=CC(NS(C4=CC=C(F)C=C4)(=O)=O)=C(F)C=C3)S2	3.0	2.0	39%@1µM	n.d.	19.0	n.d	n.d.
21	O=C(C1=C(F)C(O)=C(F)C(F)=C1)C2=CC=C(C3=CC(NS(C4=CC=C(F)C=C4)(=O)=O)=C(F)C(F)=C3)S2	6.0	3.0	26%@1µM	n.d.	n.d	n.d	n.d.
22	O=C(C1=C(F)C(O)=C(F)C(F)=C1)C2=CC=C(C3=CC(NS(C4=CC=C(F)C=C4)(=O)=O)=C(F)C=C3F)S2	0.6	4.0	32.0	9	55.0	75.0	60
23	O=C(C1=C(F)C(O)=C(F)C(F)=C1)C2=CC=C(C3=CC=C(NS(C4=CC=C(F)C=C4)(=O)=O)C=C3)S2	4.0	45.0	15.0	n.d.	50.0	>120	n.d.
24	O=C(C1=C(F)C(O)=C(F)C(F)=C1)C2=CC=C(C3=C(NS(=O)(C4=CC=C(F)C=C4)=O)C=CC=C3)S2	6.0	46.0	22.0	10	66.0	61.0	92
25	O=C(C1=C(F)C(O)=C(F)C(F)=C1)C2=CC=C(C3=CC(NS(C4=CN=C(Cl)C=C4)(=O)=O)=C(F)C=C3F)S2	3.0	9.0	60.0	n.d.	n.d	n.d	n.d.
26	O=C(C1=C(F)C(O)=C(F)C(F)=C1)C2=CC=C(C3=CC(NS(C4=CC=C(C#N)C=C4)(=O)=O)=C(F)C=C3F)S2	5.0	11.0	50.0	n.d.	n.d	n.d	n.d.
27	O=C(C1=C(F)C(O)=C(F)C(F)=C1)C2=CC=C(C3=CC=C(NS(C4=CN=C(Cl)C=C4)(=O)=O)C=C3)S2	9.0	170.0	44.0	n.d.	n.d	n.d	n.d.
28	O=C(C1=C(F)C(O)=C(F)C(F)=C1)C2=CC=C(C3=CC=C(NS(C4=CC=C(C#N)C=C4)(=O)=O)C=C3)S2	9.0	198.0	30.0	n.d.	n.d	n.d	n.d.
29	O=C(C1=C(F)C(O)=C(F)C(F)=C1)C2=CC=C(C3=C(NS(=O)(C4=CN=C(Cl)C=C4)=O)C=CC=C3)S2	8.0	17.0	46.0	50	145.0	75.0	152
30	O=C(C1=C(F)C(O)=C(F)C(F)=C1)C2=CC=C(C3=C(NS(=O)(C4=CC=C(C#N)C=C4)=O)C=CC=C3)S2	7.0	4.0	57.0	n.d.	n.d	n.d	n.d.
